# Supplementary material for: Molecular composition of organic aerosols in central Amazonia: an ultra-high resolution mass spectrometry study
Source: Copernicus journal article supplement (doi:10.5194/acp-2016-404), 2016-05-25
Supplement: Supplementary file 1 [file acp-2016-404-supplement.pdf]

**Molecular composition of organic aerosols in central Amazonia: an ultra-high resolution mass spectrometry study**

I. Kourtchev<sup>1\*</sup>, R.H.M. Godoi<sup>2</sup>, S. Connors<sup>1</sup>, J.G. Levine<sup>3</sup>, A. Archibald<sup>1,4</sup>, A.F.L. Godoi<sup>2</sup>, S.L. Paralo<sup>2</sup>, C.G.G. Barbosa<sup>2</sup>, R.A.F. Souza<sup>5</sup>, A.O. Manzi<sup>6</sup>, R. Seco<sup>7</sup>, S. Sjostedt<sup>8</sup>, J.-H. Park<sup>9</sup>, A. Guenther<sup>7,10</sup>, S. Kim<sup>7</sup>, J. Smith<sup>11,12</sup>, S.T. Martin<sup>13,14</sup> and M. Kalberer<sup>1\*</sup>

<sup>1</sup>Department of Chemistry, University of Cambridge, Cambridge, CB2 1EW, UK

<sup>2</sup>Environmental Engineering Department, Federal University of Parana, Curitiba, Brazil

<sup>3</sup>School of Geography Earth & Environmental Sciences, University of Birmingham, Birmingham, B15 2TT, UK

<sup>4</sup>NCAS climate, University of Cambridge, Cambridge, CB2 1EW, UK

<sup>5</sup>State University of Amazonas, Av. Darcy Vargas, 1200, 69065-020, Manaus-AM, Brazil

<sup>6</sup>Instituto Nacional de Pesquisas da Amazônia (INPA), Clima e Ambiente (CLIAMB), Manaus-AM, Brazil

<sup>7</sup>Department of Earth System Science, University of California, Irvine CA 92697, USA

<sup>8</sup>NOAA ESRL Chemical Sciences Division, Boulder CO, USA.

<sup>9</sup>National Institute of Environmental Research, Republic of Korea

<sup>10</sup>Pacific Northwest National Laboratory, Richland WA, USA

<sup>11</sup>Atmospheric Chemistry Division, National Center for Atmospheric Research, Boulder CO, USA

<sup>12</sup>Dept of Chemistry, University of California, Irvine CA, USA

<sup>13</sup> Sch. Eng. & Appl. Sci., Harvard University, Cambridge, MA 02138 USA

<sup>14</sup>Dep. Earth & Planetary Sciences, Harvard University, Cambridge, MA 02138 USA

\*Corresponding authors: I. Kourtchev ([ink22@cam.ac.uk](mailto:ink22@cam.ac.uk)) and M. Kalberer ([mk594@cam.ac.uk](mailto:mk594@cam.ac.uk))

**Table S11.** Aerosol sampling time, number of fires, average benzene and NO<sub>y</sub> concentrations

| Filter #ID |       | Day        | Time (UTC) | <sup>1</sup> Number of fires | <sup>2</sup> Benzene (ppbv) | <sup>3</sup> NO <sub>y</sub> (ppb) |
|------------|-------|------------|------------|------------------------------|-----------------------------|------------------------------------|
| MP14_06    | Start | 05/03/2014 | 7H47       | 0                            | 0.039                       | 0.83                               |
|            | End   | 06/03/2014 | 6H54       |                              |                             |                                    |
| MP14_16    | Start | 14/03/2014 | 6H08       | 1                            | 0.053                       | 1.64                               |
|            | End   | 15/03/2014 | 6H02       |                              |                             |                                    |
| MP14_17    | Start | 15/03/2014 | 6H16       | 4                            | 0.047                       | 1.41                               |
|            | End   | 16/03/2014 | 6H38       |                              |                             |                                    |
| MP14_18    | Start | 16/03/2014 | 6H42       | 3                            | 0.04                        | 1.63                               |
|            | End   | 17/03/2014 | 7H21       |                              |                             |                                    |
| MP14_20    | Start | 18/03/2014 | 6H16       | 0                            | 0.074                       | 2.14                               |
|            | End   | 19/03/2014 | 6H24       |                              |                             |                                    |
| MP14_28    | Start | 25/03/2014 | 6H20       | 2                            | 0.036                       | 0.76                               |
|            | End   | 26/03/2014 | 6H00       |                              |                             |                                    |
| MP14_128   | Start | 07/09/2014 | 9H25       | 28                           | 0.069                       | 2.29                               |
|            | End   | 09/09/2014 | 6H35       |                              |                             |                                    |
| MP14_129   | Start | 09/09/2014 | 6H41       | 9                            | 0.057                       | 1.84                               |
|            | End   | 10/09/2014 | 6H20       |                              |                             |                                    |
| MP14_131   | Start | 12/09/2014 | 10H05      | 15                           | 0.11                        | 2.77                               |
|            | End   | 13/09/2014 | 11H55      |                              |                             |                                    |
| MP14_134   | Start | 14/09/2014 | 7H14       | 22                           | 0.099                       | 2.78                               |
|            | End   | 15/09/2014 | 8H41       |                              |                             |                                    |
| MP14_135   | Start | 15/09/2014 | 8H46       | 33                           | 0.219                       | 3.52                               |
|            | End   | 16/09/2014 | 8H16       |                              |                             |                                    |
| MP14_138   | Start | 18/09/2014 | 11H43      | 36                           | 0.112                       | 1.39                               |
|            | End   | 19/09/2014 | 6H30       |                              |                             |                                    |
| MP14_143   | Start | 23/09/2014 | 10H57      | 254                          | 0.108                       | 1.90                               |
|            | End   | 24/09/2014 | 6H12       |                              |                             |                                    |
| MP14_148   | Start | 27/09/2014 | 10H03      | 340                          | 0.149                       | 4.10                               |
|            | End   | 28/09/2014 | 9H17       |                              |                             |                                    |
| MP14_153   | Start | 03/10/2014 | 11H29      | 69                           | 0.083                       | 1.67                               |
|            | End   | 04/10/2014 | 9H14       |                              |                             |                                    |

<sup>1</sup>number of fires in the radius of 200 km from the sampling station

<sup>2,3</sup>concentrations were averaged for filter sampling intervals; the instrument detection limit for benzene and NO<sub>y</sub> were below 0.02 ppbv and 0.05ppb, respectively.

source: <http://www.dpi.inpe.br/proarco/bdqueimadas/>

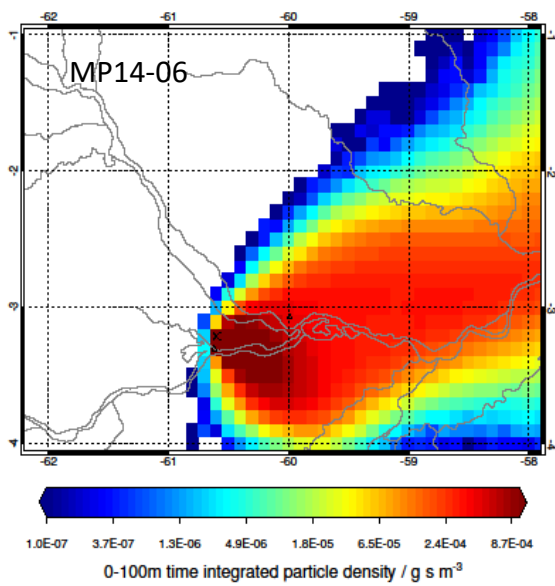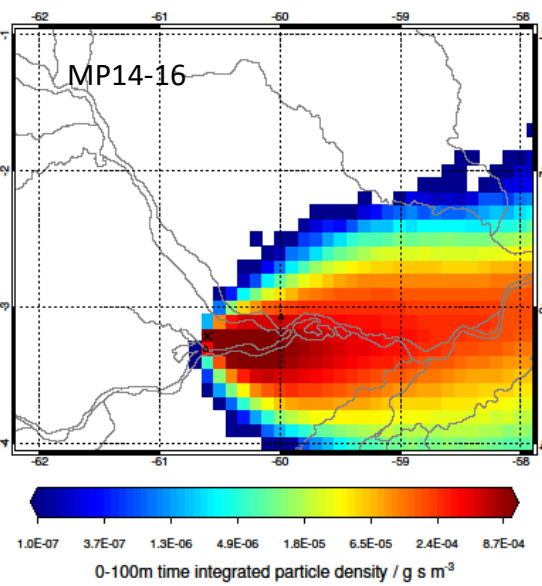

41

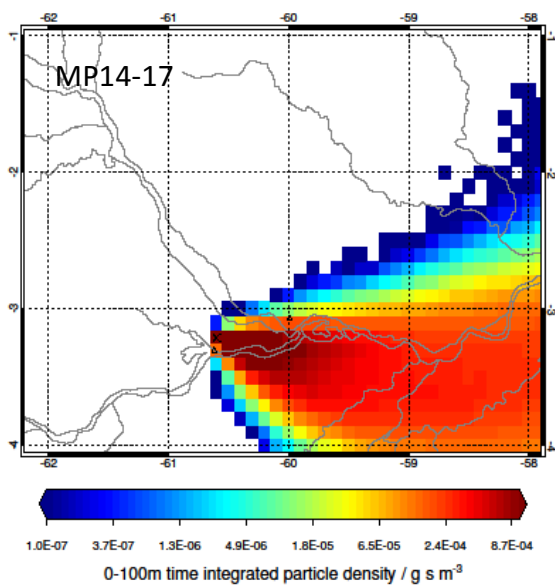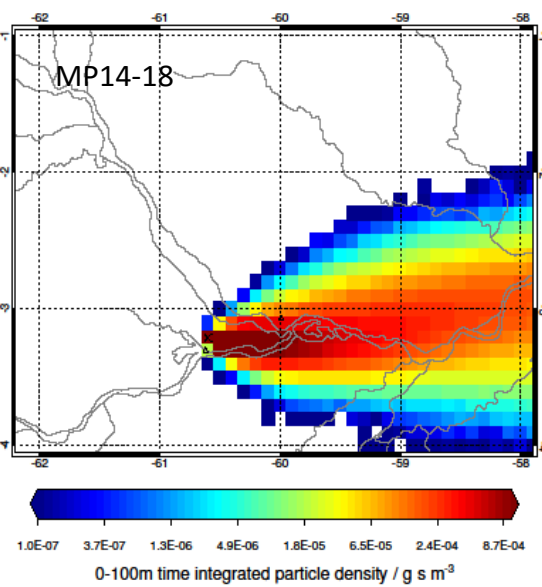

42

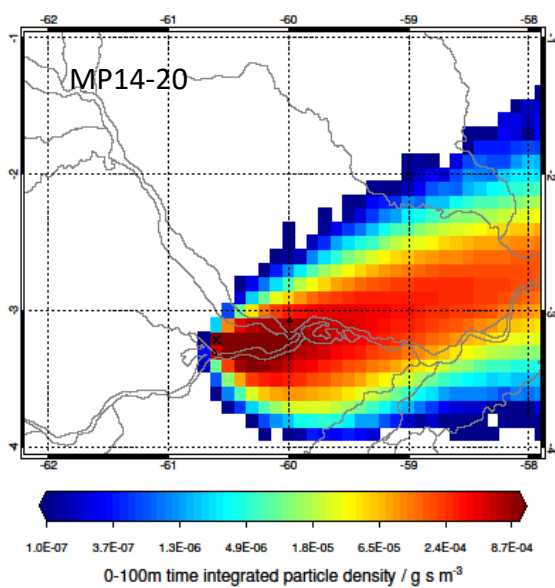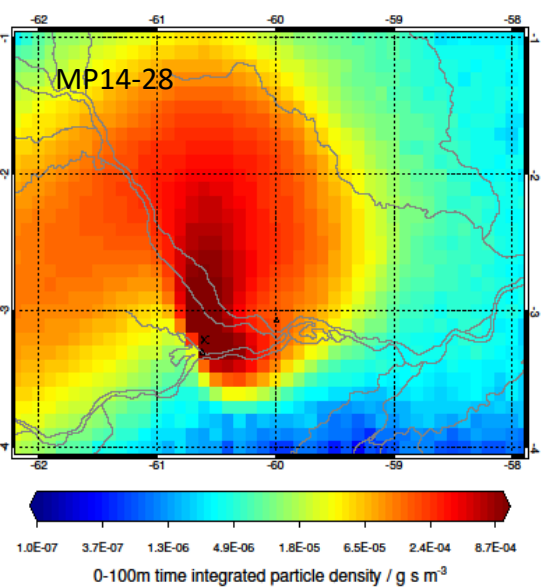

43

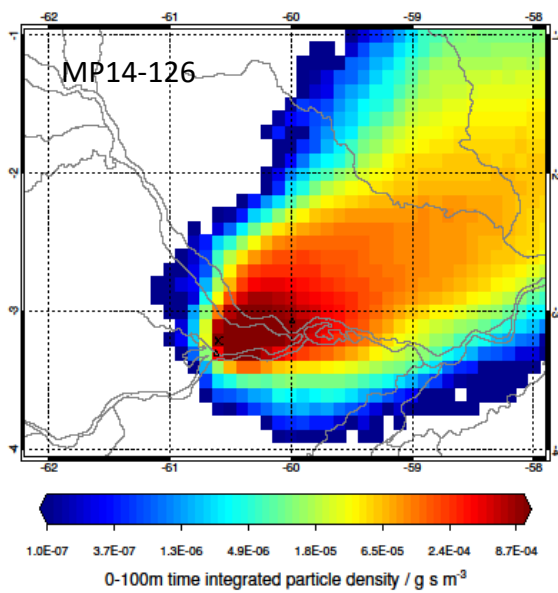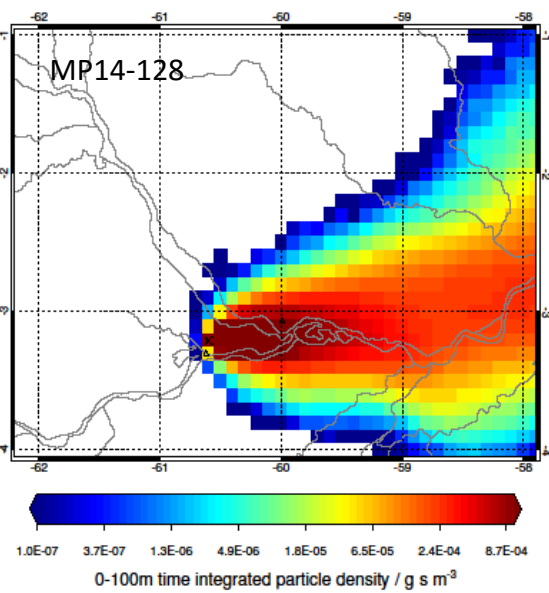

44

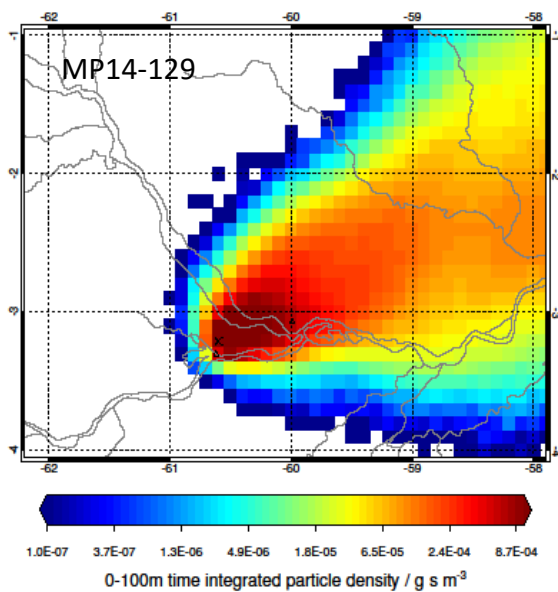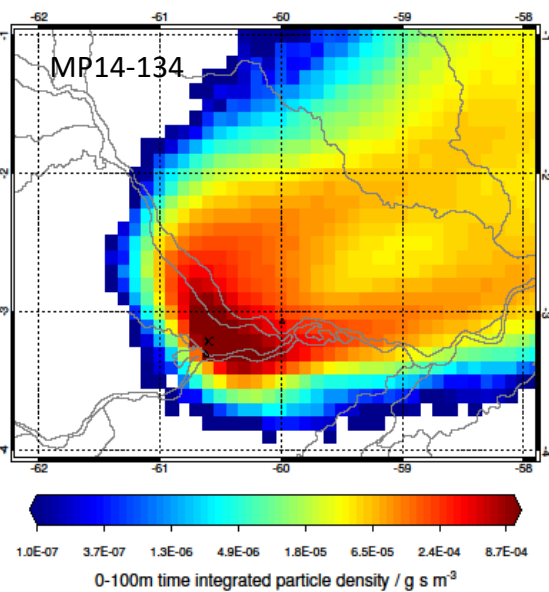

45

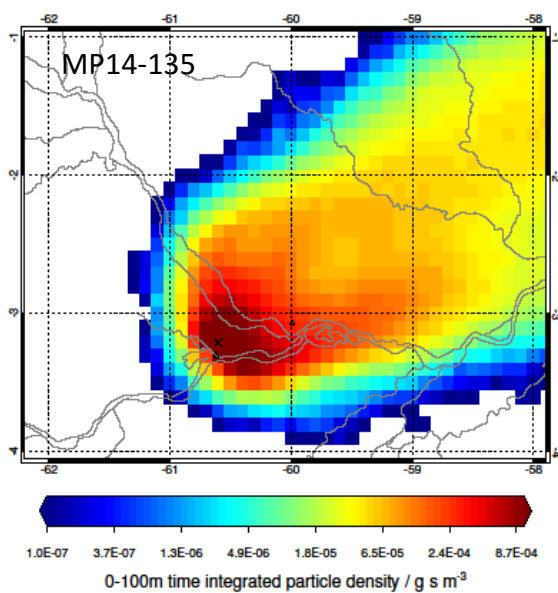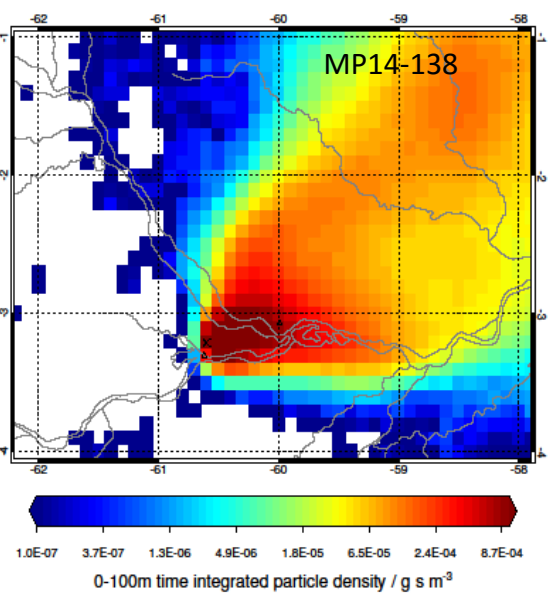

46

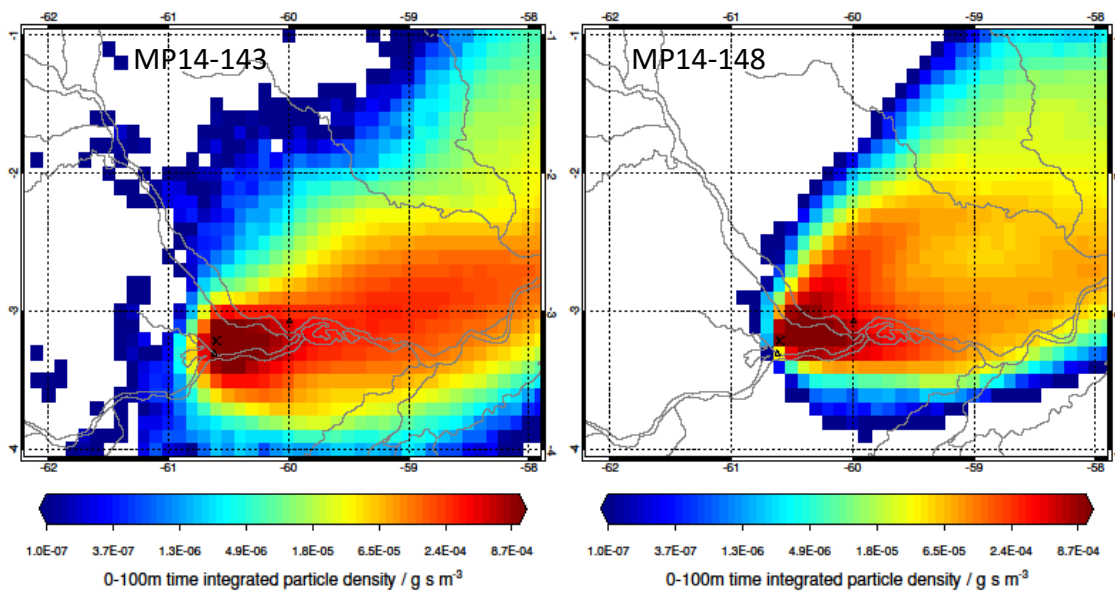

47

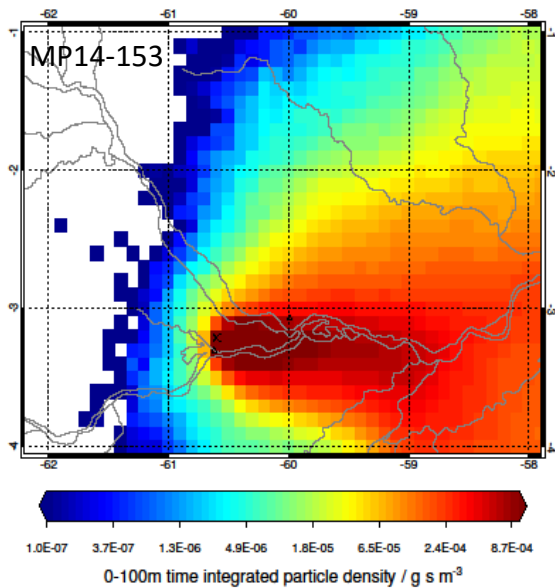

48

49 Figure SI1. 72 h back air mass history ('footprints') arriving at the T3 station for the periods  
 50 of the analysed filters. Warmer colours indicate a greater probability of a particle passing  
 51 near the surface in a grid box. The sampling site is indicated by a cross symbol. Manaus and  
 52 Manacapuru cities are indicated as triangles (far right and below of the sampling site,  
 53 respectively).

54

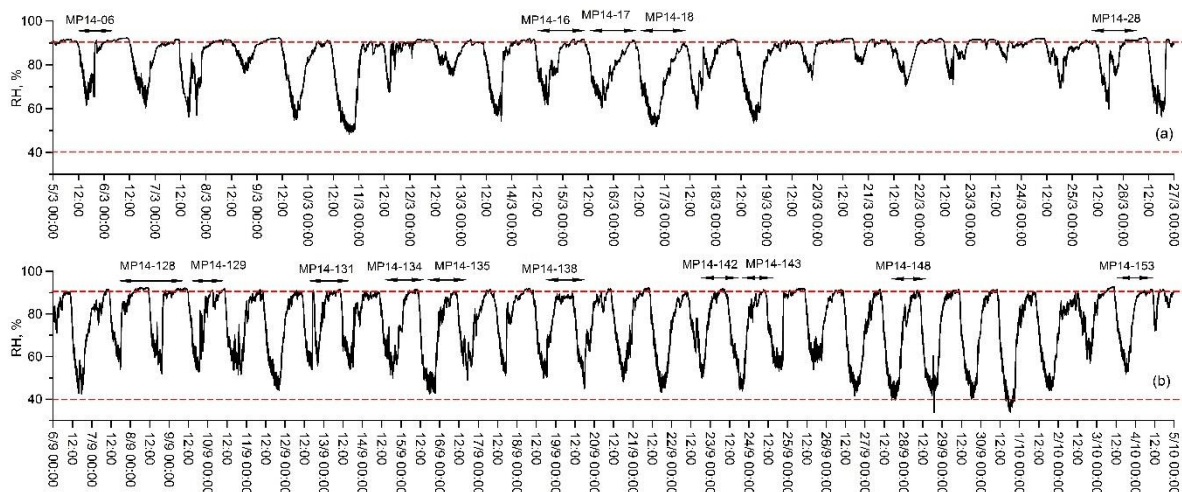

Figure SI2. RH at the T3 sampling site during (a) IOP1 and (b) IOP2. The arrows indicate sample collection periods. ARM data source.

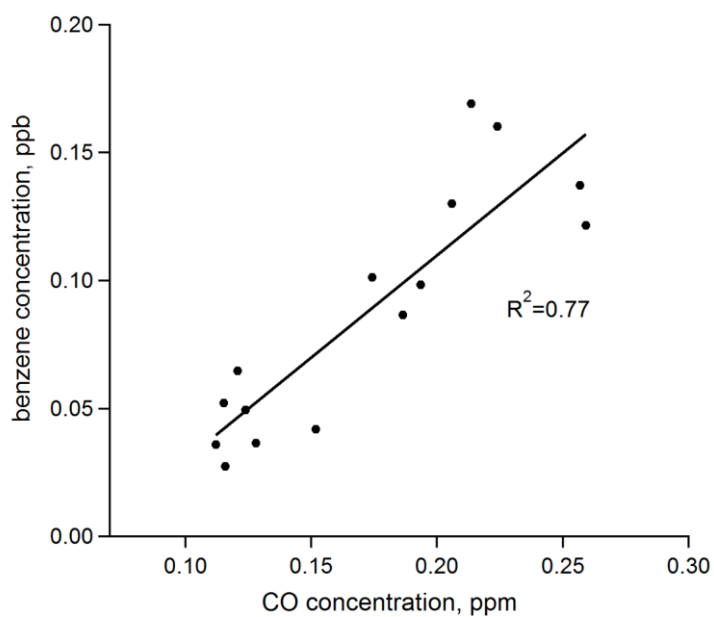

Figure SI3. Correlation between benzene and CO average concentrations during IOP1 and IOP2 sampling periods at sampling T3 site. The data was averaged for aerosol filter sampling intervals.

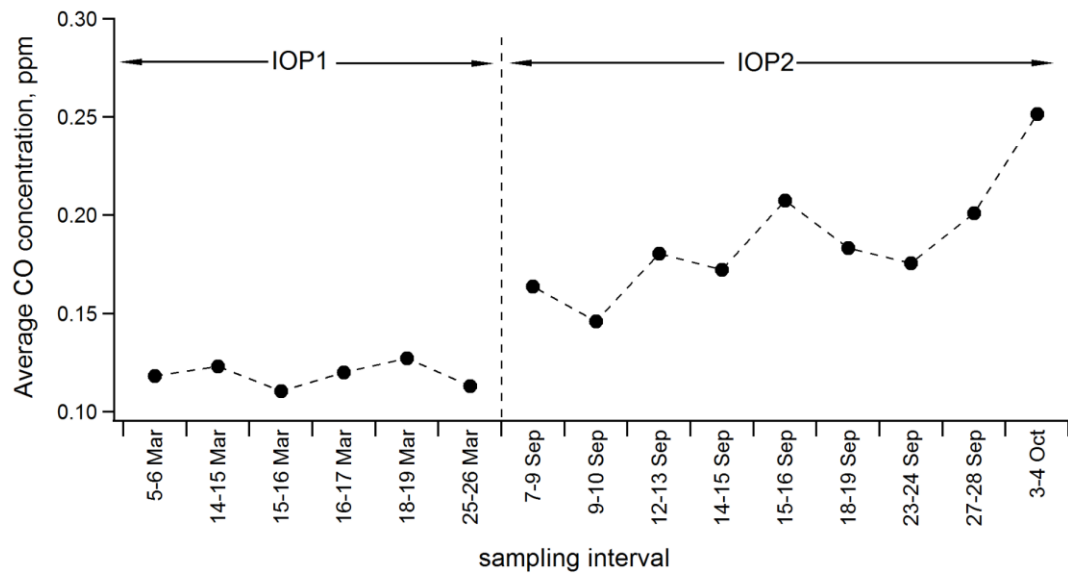

64

65 Figure SI4. Average CO concentration during IOP1 and IOP2 sampling periods at T3 site.

66 Each data point corresponds to the average concentration within the sampling interval.

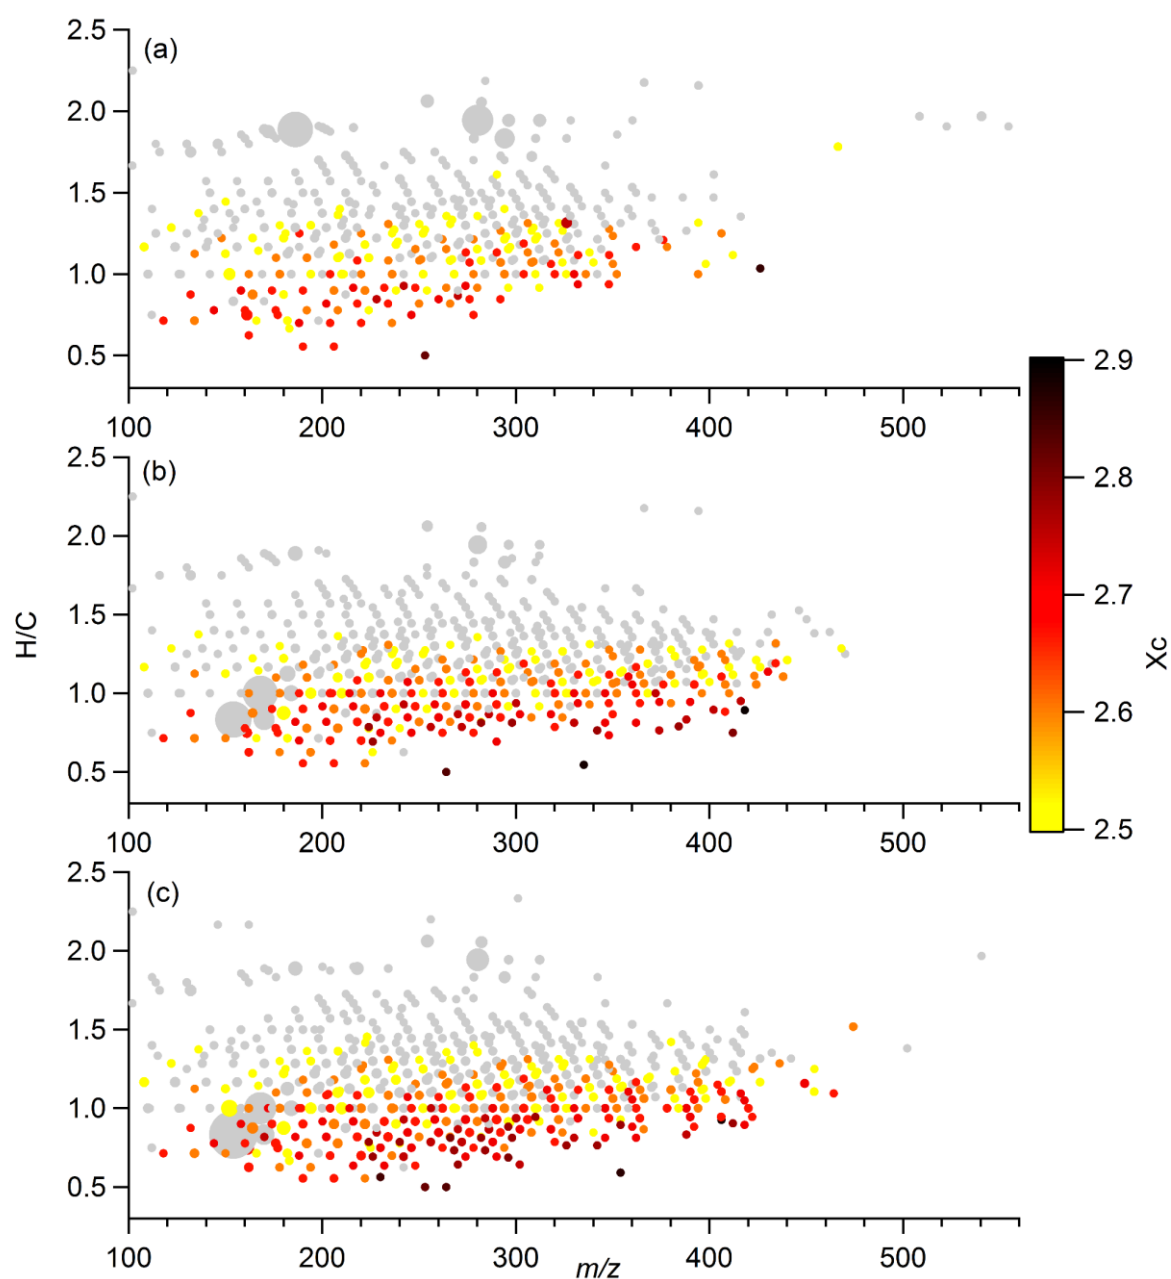

68

69 Figure SI5. H/C vs  $m/z$  plot for CHON containing formulae in the samples from the periods  
 70 with (a) low (b) moderately high and (c) very high incidents of fires. The marker areas reflect  
 71 relative ion abundance in the sample. The colour code shows aromaticity equivalent ( $X_c$ ) in  
 72 the individual molecular formula. Molecular formulae with  $X_c < 2.5$  are shown as grey  
 73 markers.

74

75



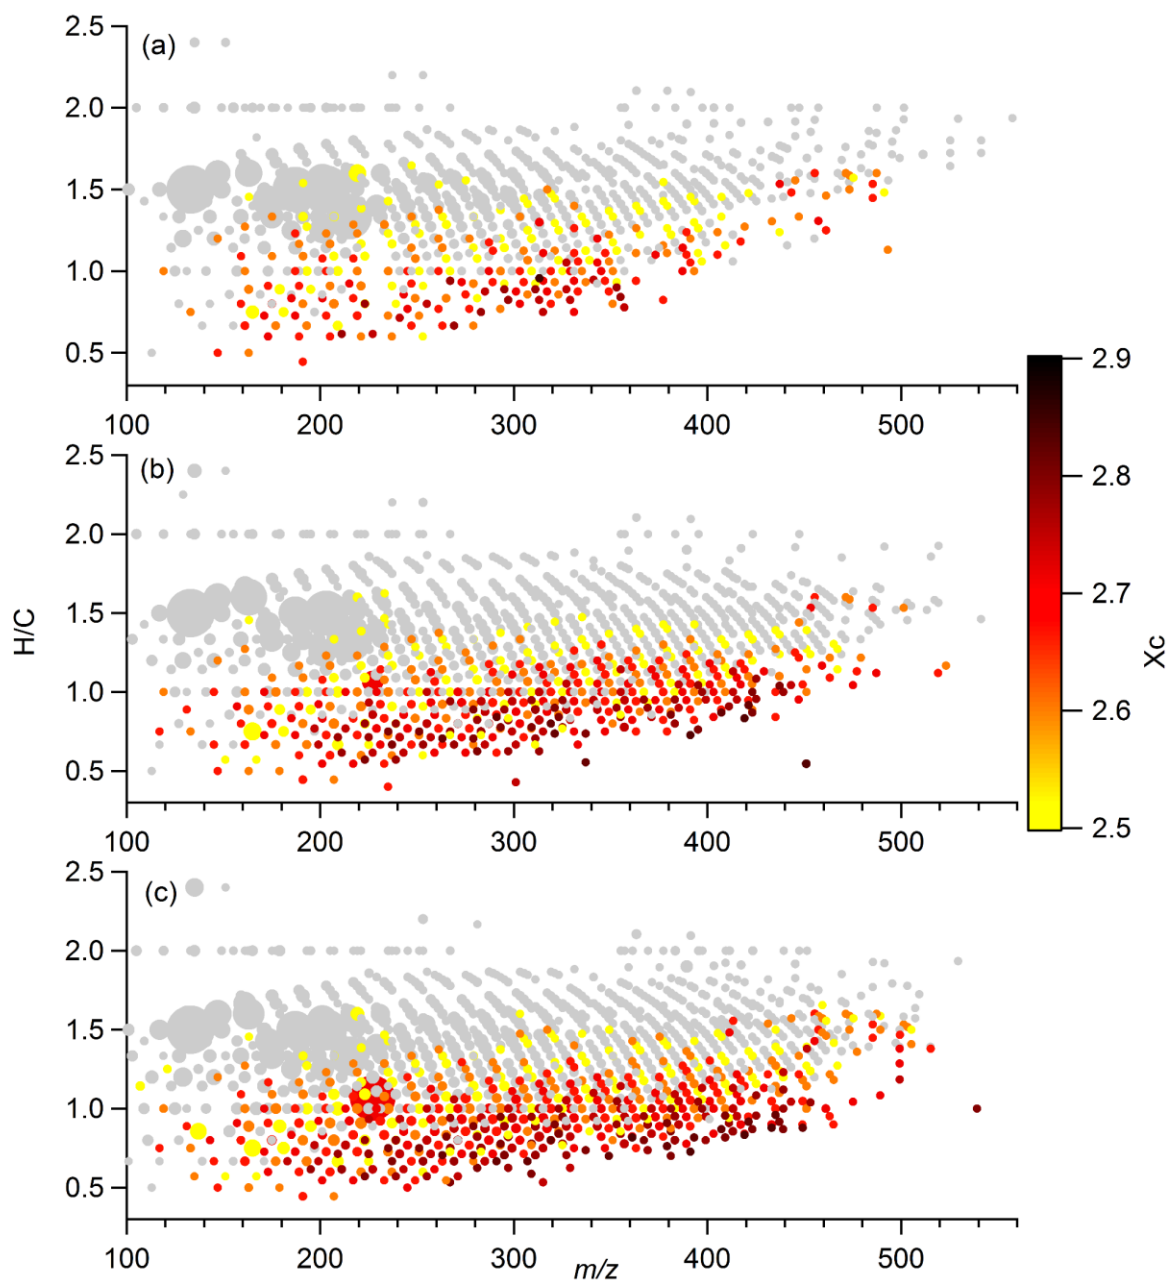

Figure SI6. H/C vs  $m/z$  plot for CHO containing compounds in the samples from the periods with (a) low (b) moderately high and (c) very high incidents of fires. The marker areas reflect relative ion abundance in the sample. The colour code shows aromaticity equivalent ( $X_c$ ) in the individual molecular formula. Molecular formulae with  $X_c < 2.5$  are shown as grey markers.

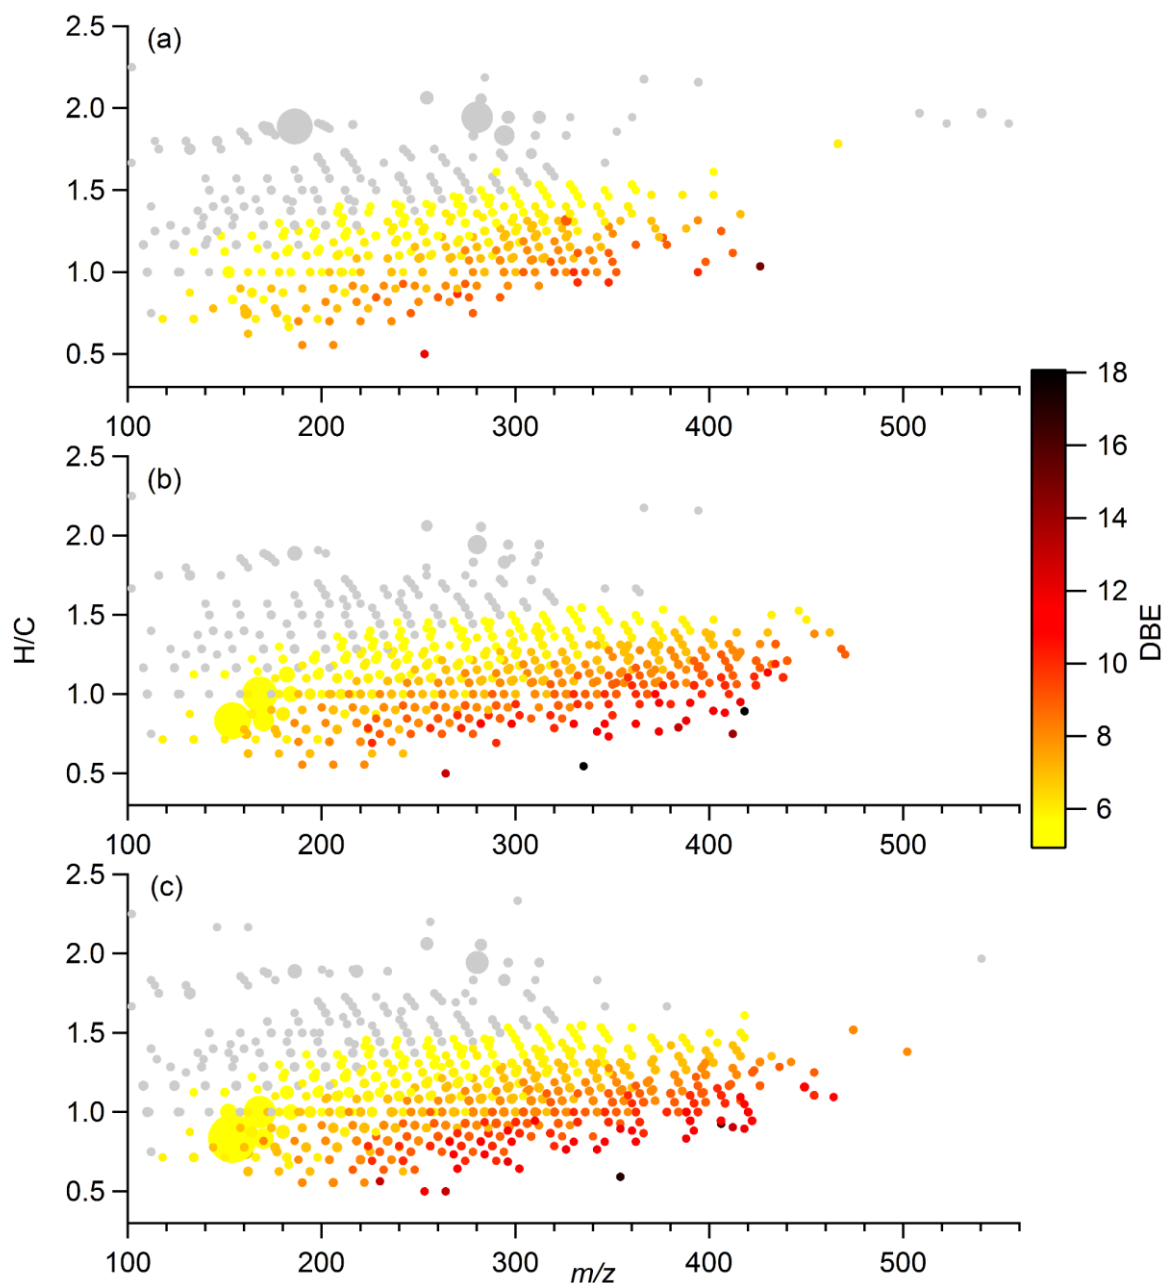

Figure SI7. H/C vs  $m/z$  plot for CHON containing compounds in the samples from the periods with (a) low (b) moderately high and (c) very high incidents of fires. The marker areas reflect relative ion abundance in the sample. The colour code shows double bond equivalent (DBE) the individual molecular formula. Molecular formulae with DBE < 5 are shown as grey markers.
